# Supplementary material
Source: publisher site journal article supplement (https://www.spandidos-publications.com/5860/downloadSupplementary)
Supplement: Supplementary file 1 [file downloadSupplementary]

Figure S1. Summary risk of bias.

|                        | Random sequence generation (selection bias) | Allocation concealment (selection bias) | Blinding of participants and personnel (performance bias) | Blinding of outcome assessment (detection bias) | Incomplete outcome data (attrition bias) | Selective reporting (reporting bias) | Other bias |
|------------------------|---------------------------------------------|-----------------------------------------|-----------------------------------------------------------|-------------------------------------------------|------------------------------------------|--------------------------------------|------------|
| Arun BK, 2011          | +                                           | ?                                       | ?                                                         | ?                                               | +                                        | +                                    | +          |
| Baldini E, 2003        | +                                           | +                                       | ?                                                         | ?                                               | +                                        | +                                    | +          |
| Bao ZH, 2016           | +                                           | ?                                       | ?                                                         | ?                                               | +                                        | +                                    | ?          |
| Blondeaux E, 2020      | +                                           | ?                                       | -                                                         | -                                               | +                                        | +                                    | +          |
| Brandberg Y, 2020      | +                                           | ?                                       | -                                                         | -                                               | ?                                        | +                                    | +          |
| Burnell M, 2010        | +                                           | +                                       | ?                                                         | ?                                               | +                                        | +                                    | +          |
| Cameron D (a), 2017    | +                                           | ?                                       | -                                                         | -                                               | +                                        | +                                    | +          |
| Cameron D (b), 2017    | +                                           | +                                       | -                                                         | -                                               | +                                        | +                                    | +          |
| Citron ML, 2003        | ?                                           | ?                                       | ?                                                         | ?                                               | +                                        | +                                    | +          |
| Del Mastro L, 2015     | +                                           | ?                                       | -                                                         | -                                               | ?                                        | +                                    | +          |
| Foukakis T, 2016       | +                                           | ?                                       | -                                                         | -                                               | ?                                        | +                                    | ?          |
| Gogas H, 2012          | +                                           | +                                       | ?                                                         | ?                                               | +                                        | +                                    | +          |
| Jin C, 2012            | +                                           | ?                                       | ?                                                         | ?                                               | +                                        | +                                    | +          |
| Lambertini M (a), 2017 | +                                           | ?                                       | -                                                         | -                                               | +                                        | ?                                    | +          |
| Lambertini M (b), 2017 | +                                           | ?                                       | -                                                         | -                                               | +                                        | ?                                    | +          |
| Liu Y, 2021            | +                                           | ?                                       | ?                                                         | ?                                               | +                                        | +                                    | +          |
| Matikas A, 2018        | +                                           | ?                                       | ?                                                         | ?                                               | ?                                        | +                                    | +          |
| Möbus V, 2018          | +                                           | +                                       | -                                                         | -                                               | +                                        | +                                    | +          |
| Moebus V, 2010         | +                                           | ?                                       | ?                                                         | ?                                               | +                                        | +                                    | +          |
| Schneeweiss A, 2019    | +                                           | +                                       | ?                                                         | ?                                               | +                                        | +                                    | +          |
| Schneeweiss A, 2022    | +                                           | +                                       | -                                                         | -                                               | +                                        | +                                    | +          |
| Swain SM, 2013         | +                                           | ?                                       | ?                                                         | ?                                               | +                                        | +                                    | +          |
| Therasse P, 2003       | +                                           | ?                                       | ?                                                         | ?                                               | +                                        | +                                    | +          |
| Untch M, 2009          | +                                           | ?                                       | ?                                                         | ?                                               | +                                        | +                                    | +          |
| Untch M, 2011          | +                                           | ?                                       | -                                                         | -                                               | +                                        | +                                    | +          |
| van Rossum AGJ, 2018   | +                                           | ?                                       | ?                                                         | ?                                               | +                                        | +                                    | +          |
| Venturini M, 2005      | +                                           | +                                       | -                                                         | -                                               | +                                        | +                                    | +          |
| Zhang CW, 2016         | +                                           | ?                                       | ?                                                         | ?                                               | +                                        | +                                    | +          |
| Zhu X, 2013            | +                                           | ?                                       | ?                                                         | ?                                               | +                                        | +                                    | +          |
